# Supplementary material for: Identifying core elements of professional identity among Japanese physiotherapists: a scale revision and validation
Source: Research Square preprint supplement (doi:10.21203/rs.3.rs-8260003/v1), 2026-02-09
Supplement: Supplementary file 1 [file 55b9f2c6e954d6a2a76ffed7.xlsx]

## Sheet: Sheet1
Table 3
Spearman’s rank correlations between the total score and each factor of the Professional Identity Scale for Physiotherapists and the Japanese burnout subscales
	Total score	Factor 1	Factor 2	Factor 3	Factor 4	Factor 5
Emotional exhaustion	-0.322**	-0.248**	-0.219**	-0.180**	-0.493**	-0.283**
Depersonalization	-0.281**	-0.159**	-0.144**	-0.271**	-0.449**	-0.302**
Personal accomplishment	0.498**	0.438**	0.406**	0.335**	0.523**	0.380**
**p < 0.001
