# Supplementary material for: Identifying core elements of professional identity among Japanese physiotherapists: a scale revision and validation
Source: Research Square preprint supplement (doi:10.21203/rs.3.rs-8260003/v1), 2026-02-09
Supplement: Supplementary file 2 [file 62339663c7411aa82509303f.xlsx]

## Sheet: Sheet1
Table 1
Participant characteristics (n = 1 037)
Variables	n (%) / Mean ± SD
Gender
Male	710 (68.5)
Female	322 (31.1)
No answer	5 (0.4)
Age, years	32.3 ± 8.8
Years of experience	9.5 ± 7.6
Final education
Specialized training college	706 (68.1)
Four-year college	248 (23.9)
Master’s or doctoral degree	83 (8.0)
Job position
General staff/Others	721 (69.5)
Unit chiefs/Team leaders	238 (23.0)
Section chief	23 (2.2)
Executive level	55 (5.3)
