# Supplementary material for: Identifying core elements of professional identity among Japanese physiotherapists: a scale revision and validation
Source: Research Square preprint supplement (doi:10.21203/rs.3.rs-8260003/v1), 2026-02-09
Supplement: Supplementary file 3 [file 7f39fa7f2ae1f7614c15716a.docx]

STROBE Statement—Checklist of items that should be included in reports of ***cross-sectional studies***

(with supplementary COSMIN elements for measurement properties)

|  | Item No | Recommendation | Reported on page |  | COSMIN Supplement  (if applicable) |
| --- | --- | --- | --- | --- | --- |
| **Title and abstract** | 1 | (*a*) Indicate the study’s design with a commonly used term in the title or the abstract | p. 1 | Study design (cross-sectional survey) indicated in the abstract. | Title/abstract clearly state cross-sectional design and scale validation. |
| (*b*) Provide in the abstract an informative and balanced summary of what was done and what was found | pp. 1–2 | Objectives, methods, main findings, and conclusions summarized in the abstract. | Objective, design, participants, methods, main findings, and conclusions were clearly summarized in the abstract. |
| Introduction | | |  |  |  |
| Background/rationale | 2 | Explain the scientific background and rationale for the investigation being reported | pp. 3–4 | Background and rationale for the research described. | Not applicable |
| Objectives | 3 | State specific objectives, including any prespecified hypotheses | p. 4 | Objectives clearly stated. | Not applicable |
| Methods | | |  |  |  |
| Study design | 4 | Present key elements of study design early in the paper | p. 4 | Cross-sectional web-based survey described. | Not applicable |
| Setting | 5 | Describe the setting, locations, and relevant dates, including periods of recruitment, exposure, follow-up, and data collection | pp. 4–5 | Institutions, survey period, and method specified. | Not applicable |
| Participants | 6 | (*a*) Give the eligibility criteria, and the sources and methods of selection of participants | p. 5 | Physiotherapists at 499 institutions invited; inclusion criteria explained. | Sample size justification for measurement properties; adequacy for factor analysis (COSMIN). |
| Variables | 7 | Clearly define all outcomes, exposures, predictors, potential confounders, and effect modifiers. Give diagnostic criteria, if applicable | pp. 5–7 | Variables (demographics, scale items, Burnout Scale) defined. | Clear definition of construct; content validity process (item generation, expert review). |
| Data sources/ measurement | 8* | For each variable of interest, give sources of data and details of methods of assessment (measurement). Describe comparability of assessment methods if there is more than one group | pp. 5–7 | Questionnaire and validated scales described. | Description of development process, item reduction, cross-cultural adaptation (if relevant). |
| Bias | 9 | Describe any efforts to address potential sources of bias | pp. 4–5 | Possible selection bias and steps to minimize described. | Not applicable |
| Study size | 10 | Explain how the study size was arrived at | p. 5 | Sample size was based on guidelines recommending ≥200–300 participants for factor analysis; therefore, we set 500 as our target sample size and obtained 1 037 responses, exceeding this threshold. | Not applicable |
| Quantitative variables | 11 | Explain how quantitative variables were handled in the analyses. If applicable, describe which groupings were chosen and why | pp. 5–8 | Scoring methods and handling of variables explained. | Not applicable |
| Statistical methods | 12 | (*a*) Describe all statistical methods, including those used to control for confounding | pp. 7–8 | EFA, reliability (Cronbach’s α), and correlation analyses reported. | Reporting of reliability (Cronbach’s α), structural validity (factor analysis), criterion validity (correlations). |
| (*b*) Describe any methods used to examine subgroups and interactions | (N/A) | No subgroup or interaction analyses conducted. |  |
| (*c*) Explain how missing data were addressed | p. 5 | No missing data (all items required in the web survey). | Not applicable |
| (*d*) If applicable, describe analytical methods taking account of sampling strategy | pp. 4–5 | Convenience sampling described; no weighting applied. | Not applicable |
| (*e*) Describe any sensitivity analyses | (N/A) | No sensitivity analyses conducted. | Not applicable |
| Results | | |  |  |  |
| Participants | 13* | (a) Report numbers of individuals at each stage of study—eg numbers potentially eligible, examined for eligibility, confirmed eligible, included in the study, completing follow-up, and analysed | p. 8 | Number of participants at each stage reported. | Report sample characteristics and adequacy for psychometric testing. |
| (b) Give reasons for non-participation at each stage | (N/A) | Reasons for non-participation could not be obtained due to the voluntary nature of the web-based survey. | Not applicable |
| (c) Consider use of a flow diagram | Appendix B. Supporting information | A flowchart illustrating the study process is included in Appendix B in the Supporting information. | Not applicable |
| Descriptive data | 14* | (a) Give characteristics of study participants (eg demographic, clinical, social) and information on exposures and potential confounders | p. 8 | Participant characteristics (gender, age, years of clinical experience, education, job position) reported. | Present distribution of item scores, check for floor/ceiling effects. |
| (b) Indicate number of participants with missing data for each variable of interest | p. 5 | This study had no missing data because the web-based questionnaire required responses to all items before submission. | Not applicable |
| Outcome data | 15* | Report numbers of outcome events or summary measures | pp. 8–9 | Factor structure, internal consistency, and correlations with burnout subscales reported. | Factor structure, reliability indices, validity results explicitly reported. |
| Main results | 16 | (*a*) Give unadjusted estimates and, if applicable, confounder-adjusted estimates and their precision (eg, 95% confidence interval). Make clear which confounders were adjusted for and why they were included | pp. 8–9 | Unadjusted results presented with factor loadings and correlations. | Not applicable |
| (*b*) Report category boundaries when continuous variables were categorized | (N/A) | No categorization of continuous variables was performed. | Not applicable |
| (*c*) If relevant, consider translating estimates of relative risk into absolute risk for a meaningful time period | (N/A) | Not relevant to a scale validation study. | Not applicable |
| Other analyses | 17 | Report other analyses done—eg analyses of subgroups and interactions, and sensitivity analyses | (N/A) | No sensitivity analyses were conducted because they were not applicable to this study. | Not applicable |
| Discussion | | |  |  |  |
| Key results | 18 | Summarise key results with reference to study objectives | p. 9 | Main findings summarized with reference to study objectives. | Not applicable |
| Limitations | 19 | Discuss limitations of the study, taking into account sources of potential bias or imprecision. Discuss both direction and magnitude of any potential bias | pp. 13–14 | Limitations of sample representativeness and cross-sectional design discussed. | Limitations of measurement properties (e.g., generalisability, need for confirmatory factor analysis). |
| Interpretation | 20 | Give a cautious overall interpretation of results considering objectives, limitations, multiplicity of analyses, results from similar studies, and other relevant evidence | pp. 10–14 | Cautious interpretation provided, considering prior literature and effect sizes. | Interpretation includes construct validity and implications for use in practice. |
| Generalisability | 21 | Discuss the generalisability (external validity) of the study results | pp. 13–14 | External validity discussed in relation to physiotherapists in Japan. | Not applicable |
| Other information | | |  |  |  |
| Funding | 22 | Give the source of funding and the role of the funders for the present study and, if applicable, for the original study on which the present article is based | p. 14 | Sources of support and absence of conflicts reported. | External validity of the scale for other populations/settings, per COSMIN guidance. |

*Give information separately for exposed and unexposed groups.

**Note:** An Explanation and Elaboration article discusses each checklist item and gives methodological background and published examples of transparent reporting. The STROBE checklist is best used in conjunction with this article (freely available on the Web sites of PLoS Medicine at http://www.plosmedicine.org/, Annals of Internal Medicine at http://www.annals.org/, and Epidemiology at http://www.epidem.com/). Information on the STROBE Initiative is available at www.strobe-statement.org.
