# Supplementary material for: Identifying core elements of professional identity among Japanese physiotherapists: a scale revision and validation
Source: Research Square preprint supplement (doi:10.21203/rs.3.rs-8260003/v1), 2026-02-09
Supplement: Supplementary file 4 [file 8b023be0e2fa7f56518a6cba.docx]

**Appendix A. Supporting information**

**The 28-item Professional Identity Scale for Physiotherapists (PISP-28)**

**Factor 1: Development of and Contribution to the Professional Group**

1. I believe I contribute to the development of student education.
2. I believe I am a role model for my junior colleagues.
3. I believe I serve as a mentor for my junior colleagues.
4. I believe I serve as an advisor to my junior colleagues.
5. I believe I contribute to the development of my junior colleagues.
6. I believe my experience and knowledge should be passed on to my junior colleagues.
7. I believe I am actively engaged in academic activities.
8. I believe my experience as a physiotherapist benefits my junior colleagues’ practice.

**Factor 2: Practical Skills**

1. I believe I have strong skills in observing and analyzing my clients.
2. I believe I have strong problem-solving skills for addressing my clients’ issues.
3. I believe I have a strong ability to provide physiotherapy based on evidence.
4. I believe I have strong skills in managing risks based on physicians’ diagnoses.
5. I believe I have a strong ability to provide physiotherapy from a preventive perspective.
6. I believe I have a strong ability to provide explanations that my clients can understand and accept.
7. I believe I have strong interpersonal skills in clinical settings.

**Factor 3: Client-Centered Support**

1. I believe I respect the individuality of my clients.
2. I believe I support my clients’ rights to self-selection and self-determination.
3. I believe I contribute to my clients’ lives and social participation.
4. I believe I work toward the same goals as my clients.
5. I believe I am able to notice even the subtlest changes in my clints.

**Factor 4: Sense of Adaptability**

1. I believe I want to continue working as a physiotherapist throughout my life.
2. I believe being a physiotherapist feels authentic to who I am.
3. I believe I work with vitality and enthusiasm.

**Factor 5: Orientation Toward Contributing to Interprofessional Collaboration**

1. I believe I am needed by other professionals within the team.
2. I believe I am able to demonstrate my expertise in relationships with other professionals.
3. I believe I contribute to team-based healthcare as a physiotherapist.
4. I believe I am recognized by others as an important member responsible for safeguarding lives.
5. I believe I fully understand the roles of other professionals and respect their expertise as a physiotherapist.
