# Supplementary material for: Identifying core elements of professional identity among Japanese physiotherapists: a scale revision and validation
Source: Research Square preprint supplement (doi:10.21203/rs.3.rs-8260003/v1), 2026-02-09
Supplement: Supplementary file 5 [file b2103a3fc042aa1c63afca9a.docx]

**Appendix B. Supporting information**

In accordance with STROBE and COSMIN guidelines, the following supplementary figures are provided.

**Supplementary Figure 1.** Flowchart of study participants.

Physiotherapists invited via 499 institutions (across Japan)

Responses received (*n* = 1 037)

　　　 Excluded (*n* = 0)

　　　　　　 - Missing data (*n* = 0)

　　　　　　 - Incomplete responses (*n* = 0)

Final sample analyzed (*n* = 1 037)

**Supplementary Figure 2.** Flowchart of the scale development process for the 28-item Professional Identity Scale for Physiotherapists (PISP-28).

[Step 1]

Item reduction and revised factor analysis
– Items reduced from 37 to 28 based on factor loadings and expert review
– Exploratory factor analysis performed on 28 items
– Five-factor structure identified

[Step 2]
Psychometric evaluation
– Content validity: Expert review
– Structural validity: Exploratory factor analysis
– Internal consistency: Cronbach’s α
– Criterion validity: Spearman’s correlation with the Burnout Scale

[Final Step]
Development of the 28-item version of the Professional Identity Scale for Physiotherapists (PISP-28)
