# Supplementary material for: Identifying core elements of professional identity among Japanese physiotherapists: a scale revision and validation
Source: Research Square preprint supplement (doi:10.21203/rs.3.rs-8260003/v1), 2026-02-09
Supplement: Supplementary file 6 [file cd4c7d78c7b59d8a8fb220da.xlsx]

## Sheet: Sheet1
Table 2
Factor analysis of the 28-item Professional Identity Scale for Physiotherapists
Factor name (No. of items, Cronbach’s α)	Factor loadings
Factor 1 (8 items): Development of and Contribution to the Professional Group (α = 0.92)	Factor 1	Factor 2	Factor 3	Factor 4	Factor 5	Total Score
25) I believe I contribute to the development of student education.	0.85	0.03	-0.04	-0.05	0	2.94 ± 1.33
23) I believe I am a role model for my junior colleagues.	0.83	0.02	-0.05	-0.06	0.08	2.90 ± 1.22
27) I believe I serve as a mentor for my junior colleagues.	0.76	-0.04	0.04	-0.15	0.2	3.32 ± 1.28
24) I believe I serve as an advisor to my junior colleagues.	0.76	0.09	-0.11	0.18	-0.2	2.49 ± 1.24
22) I believe I contribute to the development of my junior colleagues.	0.71	-0.04	0.09	-0.1	0.18	3.51 ± 1.33
28) I believe my experience and knowledge should be passed on to my junior colleagues.	0.69	0	0.11	0.1	-0.09	3.23 ± 1.33
26) I believe I am actively engaged in academic activities.	0.67	0.04	-0.14	0.12	-0.06	2.53 ± 1.38
29) I believe my experience as a physiotherapist benefits my junior colleagues’ practice.	0.61	0.09	0.09	0.07	0.02	3.37 ± 1.24
Factor 2 (7 items): Practical Skills (α = 0.92)
34) I believe I have strong skills in observing and analyzing my clients.	0.01	0.94	-0.11	0.03	0.01	3.57 ± 1.06
35) I believe I have strong problem-solving skills for addressing my clients’ issues.	0	0.93	-0.11	0.08	0.01	3.53 ± 1.02
36) I believe I have a strong ability to provide physiotherapy based on evidence.	0.1	0.73	0.04	0.02	-0.01	3.53 ± 1.04
33) I believe I have strong skills in managing risks based on physicians’ diagnoses.	-0.03	0.69	0.12	-0.05	0.09	3.69 ± 1.00
37) I believe I have a strong ability to provide physiotherapy from a preventive perspective.	0.06	0.66	0.09	0	-0.01	3.67 ± 1.10
32) I believe I have a strong ability to provide explanations that my clients can understand and accept.	0.09	0.65	0.12	-0.1	0.04	3.66 ± 1.08
30) I believe I have strong interpersonal skills in clinical settings.	0.19	0.45	0.15	-0.04	-0.04	3.62 ± 1.20
Factor 3 (5 items): Client-Centered Support (α = 0.87)
2) I believe I respect the individuality of my clients.	-0.05	0.01	0.93	-0.01	-0.09	4.51 ± 1.03
3) I believe I support my clients’ rights to self-selection and self-determination.	0.02	-0.05	0.92	0	-0.15	4.32 ± 0.98
1) I believe I contribute to my clients’ lives and social participation.	0.06	-0.02	0.58	0.01	0.19	4.19 ± 0.92
9) I believe I work toward the same goals as my clients.	-0.09	0.02	0.58	0.14	0.12	4.13 ± 1.01
4) I believe I am able to notice even the subtlest changes in my clients.	-0.04	0.23	0.53	-0.02	0.02	4.16 ± 0.98
Factor 4 (3 items): Sense of Adaptability (α = 0.85)
6) I believe I want to continue working as a physiotherapist throughout my life.	0.07	-0.07	0.02	0.85	-0.02	3.77 ± 1.40
7) I believe being a physiotherapist feels authentic to who I am.	-0.02	0.07	0	0.8	0.04	3.76 ± 1.24
11) I believe I work with vitality and enthusiasm.	0.04	-0.01	0.11	0.57	0.15	3.86 ± 1.24
Factor 5 (5 items): Orientation Toward Contributing to Interprofessional Collaboration (α = 0.91)
17) I believe I am needed by other professionals within the team.	0.04	0.07	-0.1	0	0.89	3.74 ± 1.08
16) I believe I am able to demonstrate my expertise in relationships with other professionals.	0.01	0.14	-0.06	-0.01	0.81	3.79 ± 1.10
14) I believe I contribute to team-based healthcare as a physiotherapist.	-0.05	0.02	0.15	0.05	0.7	4.05 ± 1.02
12) I believe I am recognized by others as an important member responsible for safeguarding lives.	0.11	-0.1	0.09	0.13	0.62	3.82 ± 1.05
19) I believe I fully understand the roles of other professionals and respect their expertise as a physiotherapist.	-0.02	0.2	0.19	0	0.47	3.96 ± 1.08
Cronbach α coefficient for the entire scale = 0.96
Cumulative contribution rate	47.11	54.42	58.98	61.76	63.91
Factor Correlation Matrix Factor 1.	-	0.7	0.44	0.49	0.68
Factor 2.		-	0.62	0.47	0.74
Factor 3.			-	0.52	0.72
Factor 4.				-	0.54
Factor 5.					-
Factor extraction method: Maximum likelihood method; Rotation method: Promax rotation; Deleted items: 5 (I believe I have my own perspective on the practice of physiotherapy), 8 (I believe I am helpful as a physiotherapist), 10 (I believe I am growing as a person through this work), 13 (I believe I always practice physiotherapy in a way that is authentic to myself), 15 (I believe my professional …
